# Supplementary material for: Studies on MCM-41/PDMS based hybrid polybenzoxazine nanocomposites for interlayer low k dielectrics
Source: Royal Society of Chemistry journal article supplement (doi:10.1039/c5ra02842f), 2015-01-01
Supplement: c5ra02842f1.pdf [file c5ra02842f1.pdf]

## Supplementary Information

### Studies on MCM-41/PDMS based hybrid polybenzoxazine nanocomposites for interlayer low k dielectrics

Ramachandran Sasi kumar, Mathivathanan Ariraman and Muthukaruppan Alagar\*

\*Polymer Composites Lab, Department of Chemical Engineering, A.C.Tech, Anna University, Chennai-600 025, India. E-mail: [mkalagar@yahoo.com](mailto:mkalagar@yahoo.com)

#### FTIR spectral data of

**OAP-Bz:** (KBr,  $\text{cm}^{-1}$ ): 3032 (allylic C-H), 1595 (allylic C=C stretching), 1221 (Ar-O-C), 941 (N-C-O) and 754 (ortho-substituted benzene ring).

**PDMS-Bz:** (KBr,  $\text{cm}^{-1}$ ): 2962-2897 (aliphatic CH,  $\text{CH}_2$  stretching), 1220 (Ar-O-C), 1081-1023 (Si-O-C), 943 (N-C-O).

**TES-Bz:** (KBr,  $\text{cm}^{-1}$ ): 2945-2837 (aliphatic CH,  $\text{CH}_2$  stretching), 1242 (Ar-O-C), 1100-1027 (Si-O-C), 930 (N-C-O).

**BTMS:** (KBr,  $\text{cm}^{-1}$ ): 2935 (aliphatic CH,  $\text{CH}_2$  stretching), 1223 (Ar-O-C), 1188-1081 (Si-O-C), 941 (N-C-O).

#### NMR spectral data of

##### OAP-Bz:

**$^1\text{H}$  NMR (400MHz,  $\text{CDCl}_3$ )  $\delta$  (ppm):** 7.28-6.82 (8H, Ar), 6.00-5.93 (1H, = $\text{CH}$ ), 5.37 (2H, O- $\text{CH}_2$ -N), 5.04-5.00 (2H, = $\text{CH}_2$ ), 4.62 (2H, Ar- $\text{CH}_2$ -N) and 3.34-3.32 (2H,  $\text{CH}=\text{CH}_2$ - $\text{CH}_2$ ).

##### PDMS-Bz:

**$^1\text{H}$  NMR (400MHz,  $\text{CDCl}_3$ )  $\delta$  (ppm):** 7.41-6.79 (16H, Ar), 5.34 (4H, O- $\text{CH}_2$ -N), 4.61 (4H, Ar- $\text{CH}_2$ -N), 2.59-2.55 (4H, Ar- $\text{CH}_2$ ), 1.61-1.57 (4H, Ar- $\text{CH}_2$ - $\text{CH}_2$ ), 0.61-0.57 (4H,  $\text{CH}_2$ -Si) and 0.08-0.04 (54H,  $\text{CH}_3$ -Si- $\text{CH}_3$ ).

$^{13}\text{C}$  NMR (400 MHz,  $\text{CDCl}_3$ )  $\delta$  (ppm): 148.5-118.1 (aromatic carbons), 79.04 ( $\text{O}-\underline{\text{C}}\text{H}_2-\text{Ar}$ ), 50.76 ( $\text{N}-\underline{\text{C}}\text{H}_2-\text{Ar}$ ), 33.38-18.27 (aliphatic carbons) and 1.17-1.06 ( $\underline{\text{C}}\text{H}_3-\text{Si}-\underline{\text{C}}\text{H}_3$ ).

**TES-Bz:**

$^1\text{H}$  NMR (400 MHz,  $\text{CDCl}_3$ )  $\delta$  (ppm): 7.2-6.75 (4H, Ar), 4.84 (2H,  $\text{O}-\underline{\text{C}}\text{H}_2-\text{N}$ ), 3.97 (2H,  $\text{Ar}-\underline{\text{C}}\text{H}_2-\text{N}$ ), 3.82-3.80 (6H,  $\text{O}-\underline{\text{C}}\text{H}_2-\text{CH}_3$ ), 2.76-2.73 (2H,  $\text{N}-\underline{\text{C}}\text{H}_2$ ), 1.59 (2H,  $\text{N}-\underline{\text{C}}\text{H}_2-\underline{\text{C}}\text{H}_2$ ), 1.23-1.20 (9H,  $\text{O}-\underline{\text{C}}\text{H}_2-\underline{\text{C}}\text{H}_3$ ), 0.67-0.60 (2H,  $\text{Si}-\underline{\text{C}}\text{H}_2$ ).

$^{13}\text{C}$  NMR (400 MHz,  $\text{CDCl}_3$ )  $\delta$  (ppm): 156.7-115.54 (aromatic carbons), 82.44 ( $\text{O}-\underline{\text{C}}\text{H}_2-\text{N}$ ), 58.41 ( $\text{O}-\underline{\text{C}}\text{H}_2-\text{CH}_3$ ), 55.68 ( $\text{N}-\underline{\text{C}}\text{H}_2-\text{Ar}$ ), 54.12 ( $\text{N}-\underline{\text{C}}\text{H}_2$ ), 21.39 ( $\text{N}-\underline{\text{C}}\text{H}_2-\underline{\text{C}}\text{H}_2$ ), 18.27 ( $\text{O}-\underline{\text{C}}\text{H}_2-\underline{\text{C}}\text{H}_3$ ), 7.74 ( $\text{Si}-\underline{\text{C}}\text{H}_2$ ).

$^{29}\text{Si}$  NMR (400 MHz,  $\text{CDCl}_3$ )  $\delta$  (ppm): -51.82 ( $\underline{\text{S}}\text{i}-\text{O}-\text{CH}_2-\text{CH}_3$ ).

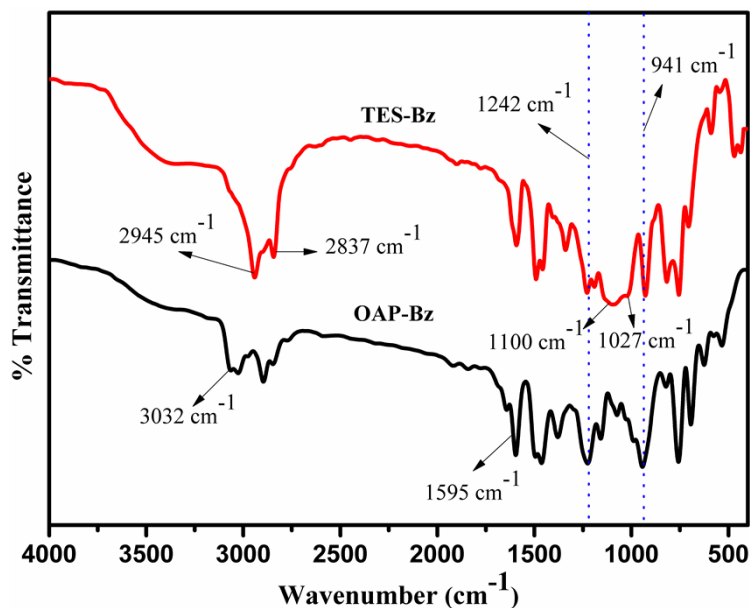

**Figure S1.** FTIR spectra of OAP-Bz and TES-Bz.

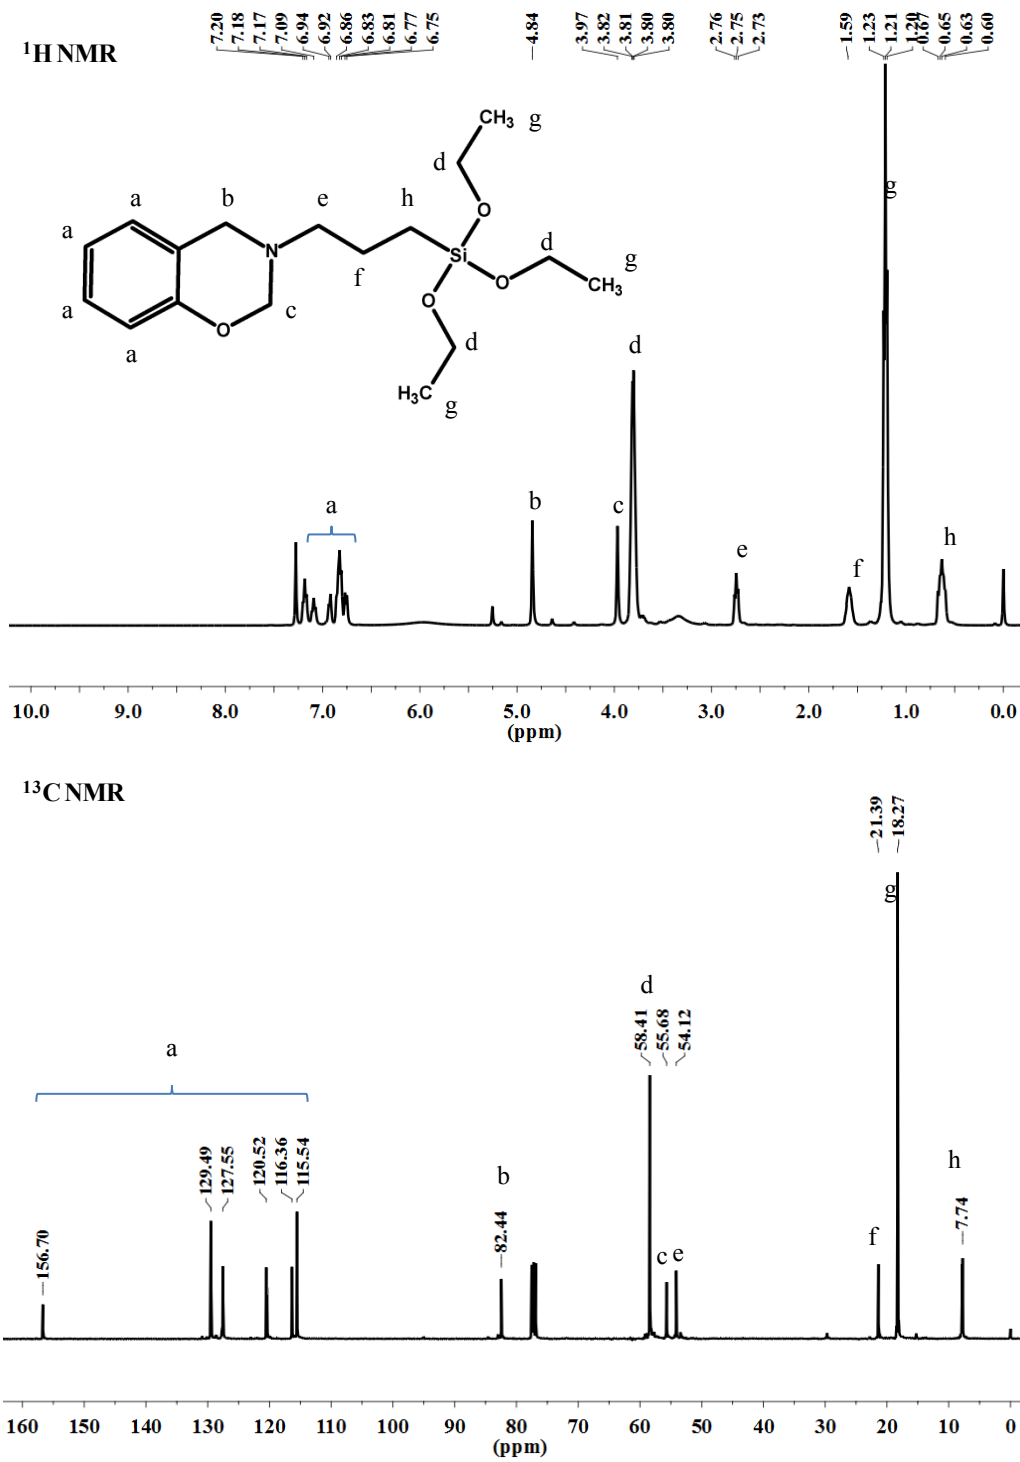

Figure S2. <sup>1</sup>H and <sup>13</sup>C NMR spectra of TES-Bz.

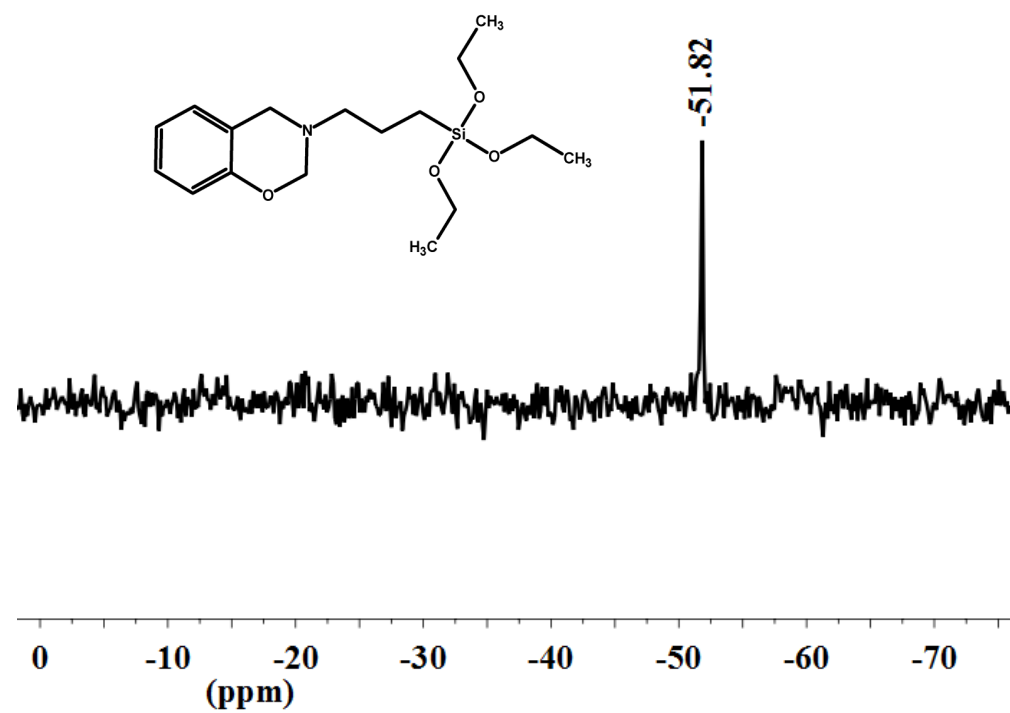

Figure S3.  $^{29}\text{Si}$  NMR spectrum of TES-Bz.
